# Supplementary material
Source: publisher figshare collection journal article supplement (https://sage.figshare.com/ndownloader/files/14182805)
Supplement: Supplementary file 1 [file 14182805]

### **Analysis of recurrent vascular intervention**

Recurrent vascular intervention was performed in 36 cases after bypass and in 34 cases after PTA. In patients unfit for bypass surgery, recurrent intervention was rarely performed. The type of recurrent vascular intervention is shown in table 1. Due to the small number in the subgroups, limb salvage analysis was only performed for the main groups in the study.

| <b>Type of intervention</b> | <b>BYPASS</b> | <b>PTA</b> | <b>PTA ONLY</b> |
|-----------------------------|---------------|------------|-----------------|
| <b>THROMBECTOMY</b>         | <b>7</b>      | <b>0</b>   | <b>0</b>        |
| <b>BYPASS</b>               | <b>7</b>      | <b>7</b>   | <b>0</b>        |
| <b>OTHER OPEN SURGERY</b>   | <b>2</b>      | <b>1</b>   | <b>0</b>        |
| <b>THROMBOLYSIS</b>         | <b>4</b>      | <b>0</b>   | <b>1</b>        |
| <b>OTHER ENDOVASCULAR</b>   | <b>13</b>     | <b>21</b>  | <b>1</b>        |
| <b>HYBRID</b>               | <b>3</b>      | <b>3</b>   | <b>0</b>        |
|                             |               |            |                 |
| <b>TOTAL OPEN SURGERY</b>   | <b>16</b>     | <b>8</b>   | <b>0</b>        |
| <b>TOTAL ENDOVASCULAR</b>   | <b>17</b>     | <b>21</b>  | <b>2</b>        |
| <b>TOTAL</b>                | <b>36</b>     | <b>32</b>  | <b>2</b>        |

**Tab. 1 Type of recurrent intervention depending on treatment group**

### Limb salvage in patients with recurrent intervention

Kaplan-Meier estimate for limb salvage at 5 years in patients with recurrent intervention was 62 % (SE = .09) after bypass surgery and 79 % (SE = .07) after PTA. There was no significant difference between the treatment groups ( $p = .74$ ). After bypass surgery, limb salvage was better in cases with single intervention ( $p = .03$ ), while there was no significant difference in the corresponding groups after PTA ( $p = .70$ ).

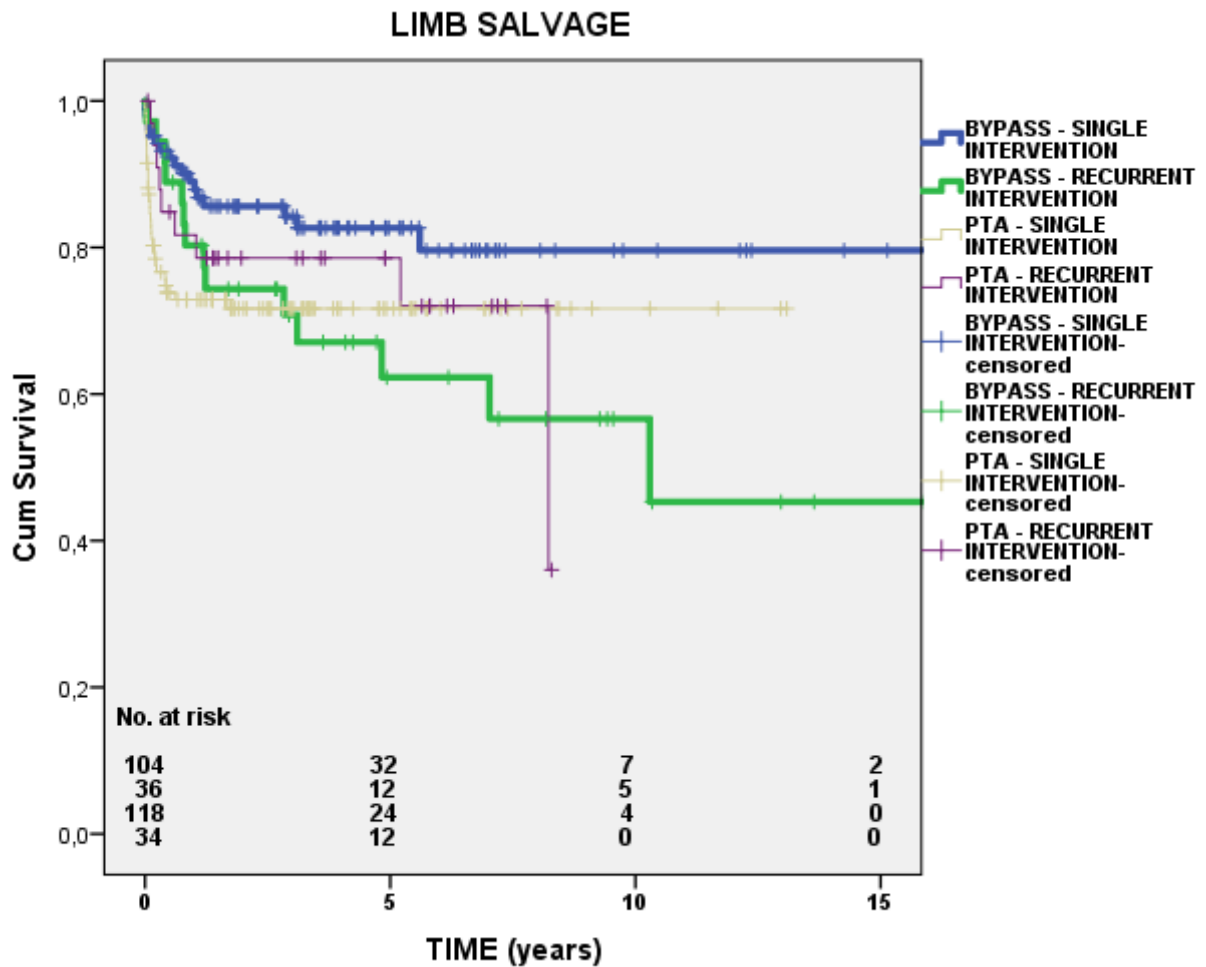

Fig. 1 Limb salvage in the treatment groups depending on recurrent intervention
